# Supplementary material for: In Silico Insights into Protein–Protein Interaction Disruptive Mutations in the PCSK9-LDLR Complex
Source: MDPI journal article supplement (doi:10.3390/ijms21051550), 2020-02-25
Supplement: s1 [file s1]

## **Supplementary Information**

**Title: *In Silico* Insights into Protein-Protein Interaction  
Disruptive Mutations in PCSK9 and LDLR complex**

Corresponding to Feixiong Cheng, Ph.D.

Lerner Research Institute, Cleveland Clinic

Email: [chengf@ccf.org](mailto:chengf@ccf.org)

Fax: 216-6361609; Tel: 216-4447654

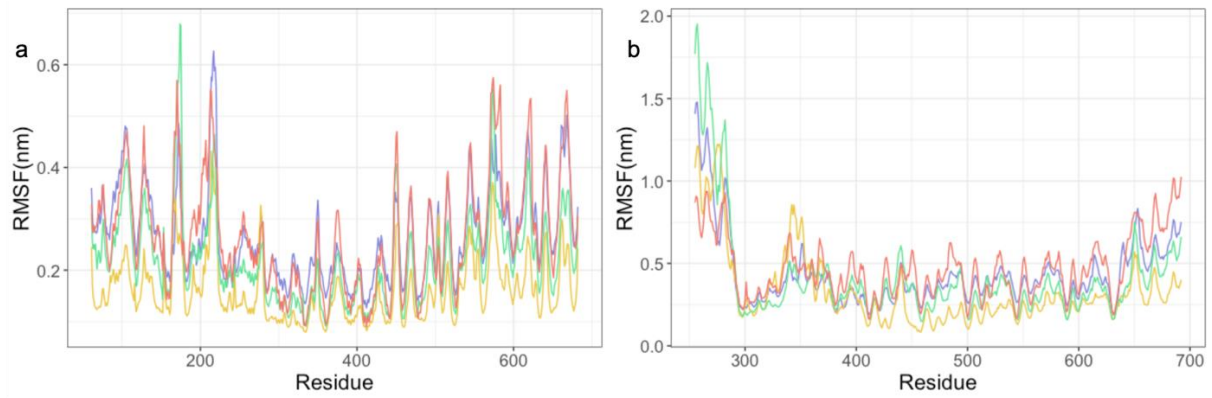

*Supplementary Figure S1: RMSF plots of (a) PCSK9 and (b) LDLR. Wild-type is colored in purple, Ser127Arg in green, Asp374Tyr in yellow, and Arg496Trp in red.*

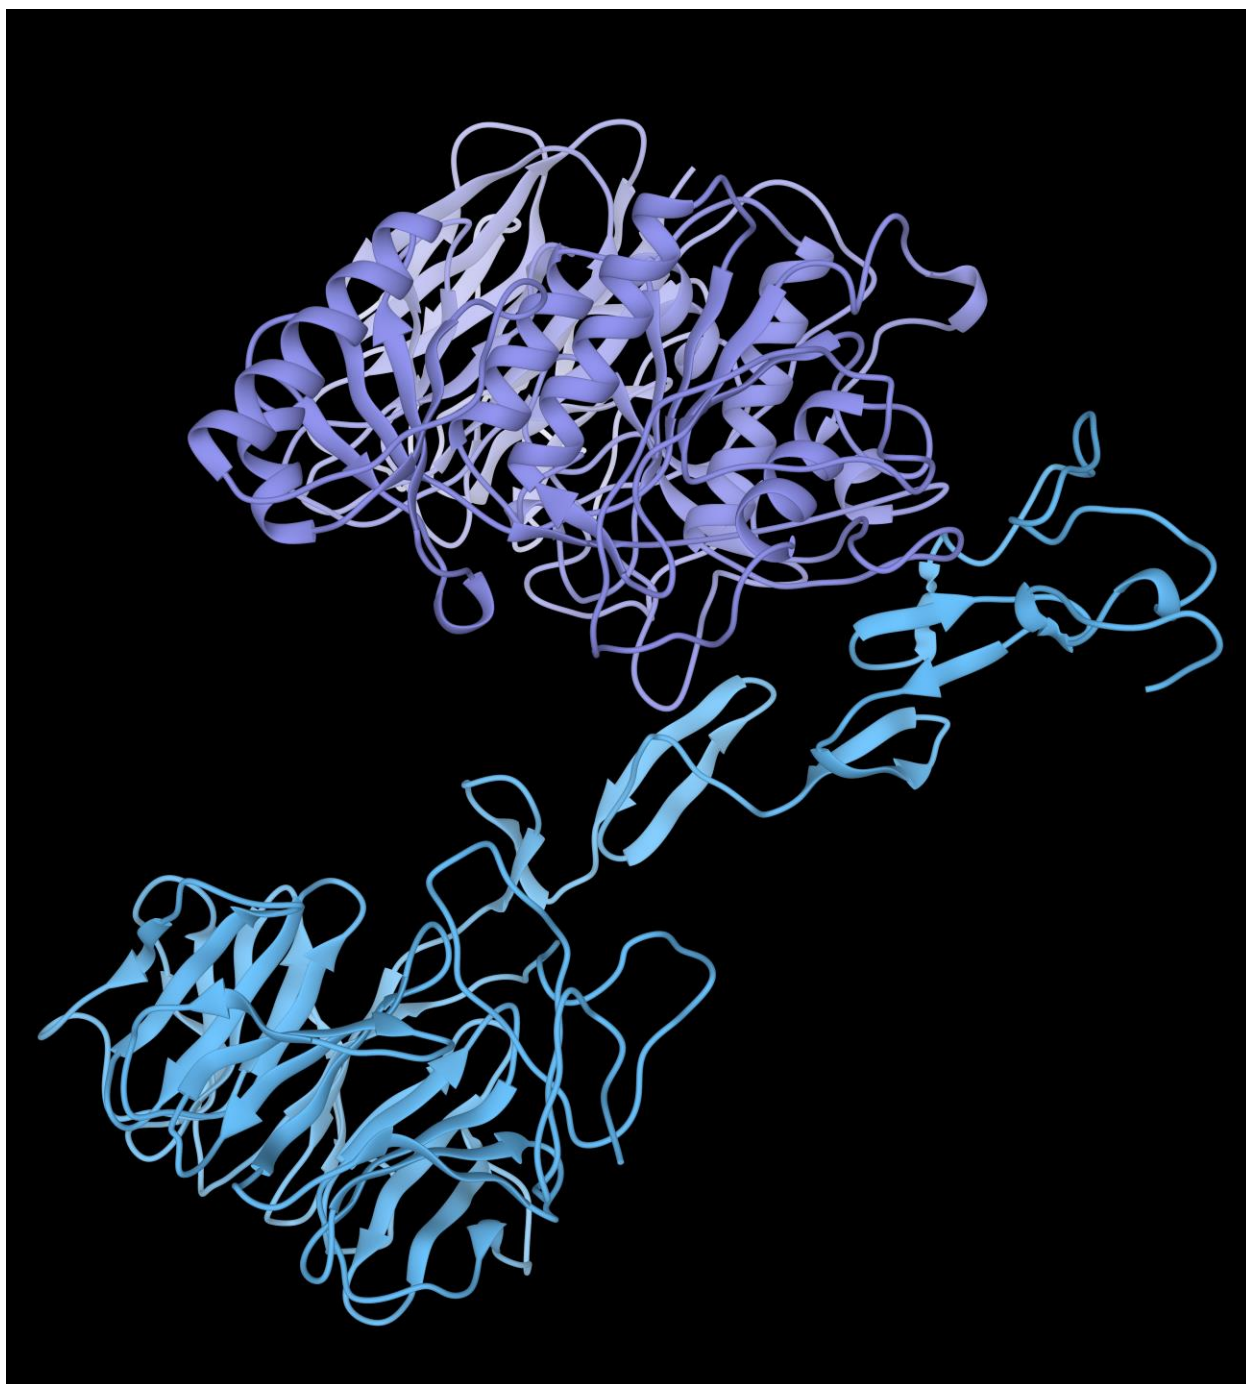

*Supplemental Figure S2: A replicate simulation of the Arg496Trp mutant in which the PCSK9/LDLR interaction does not involve the prodomain/ $\beta$ -propeller interface, but instead maintains an extended conformation.*

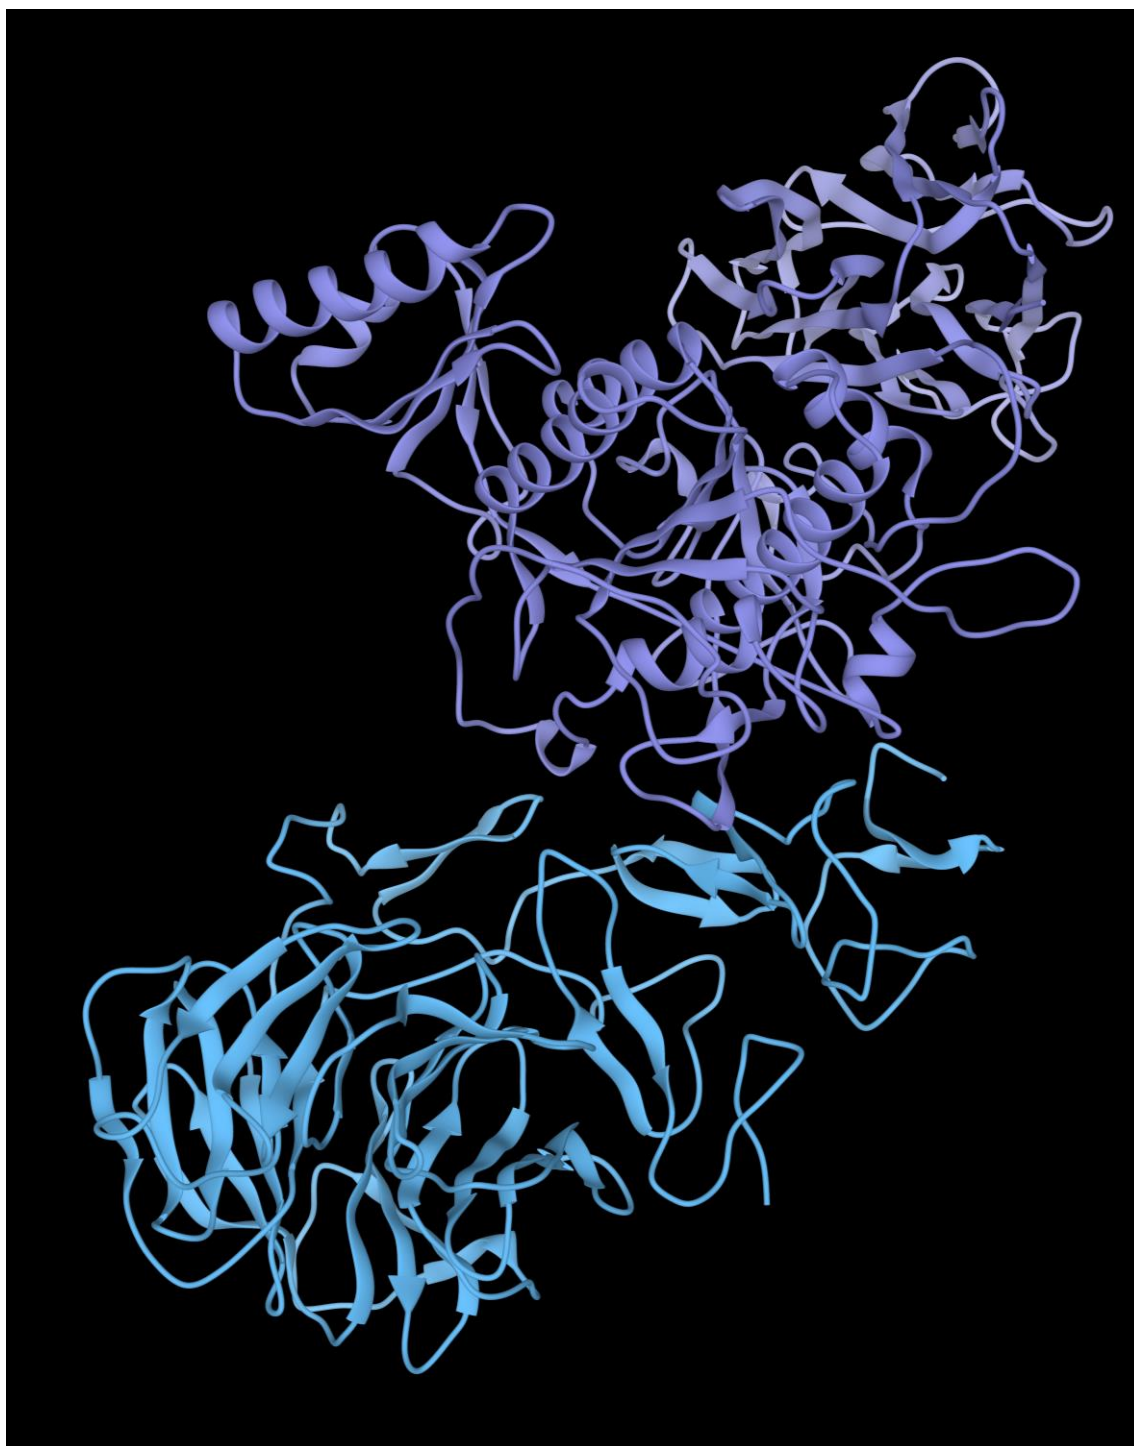

*Supplemental Figure S3: Final conformation of a replicate simulation of the Asp374Tyr mutant, showing the C terminus of the extracellular portion of the LDL receptor interacting with the EGF(A) domain.*

| RESIDUE # | Wild Type | Asp374Tyr | Ser127Arg | Arg496Trp |
|-----------|-----------|-----------|-----------|-----------|
| 70        | 4         | 3         | 0         | 0         |
| 71        | 6         | 4         | 0         | 0         |
| 73        | 1         | 2         | 1         | 0         |
| 74        | 1         | 0         | 1         | 1         |
| 75        | 3         | 2         | 4         | 2         |
| 76        | 0         | 0         | 2         | 2         |
| 78        | 0         | 0         | 1         | 0         |
| 108       | 0         | 0         | 3         | 3         |
| 110       | 0         | 0         | 2         | 3         |
| 112       | 0         | 0         | 1         | 0         |
| 125       | 0         | 0         | 2         | 2         |
| 126       | 0         | 0         | 1         | 1         |
| 127       | 0         | 0         | 4         | 4         |
| 145       | 0         | 0         | 1         | 0         |

*Supplementary Table S1: Data used to generate the heatmap for the prodomain of PCSK9/LDLR interface region. No residues from the PDB met the criteria for contact used.*

| RESIDUE # | PDB | Wild Type | Asp374Tyr | Ser127Arg | Arg496Trp |
|-----------|-----|-----------|-----------|-----------|-----------|
| 369       | 2   | 3         | 2         | 3         | 2         |
| 372       | 1   | 0         | 0         | 0         | 0         |
| 374       | 1   | 0         | 3         | 0         | 1         |
| 375       | 1   | 1         | 1         | 1         | 1         |
| 377       | 2   | 2         | 2         | 2         | 2         |
| 378       | 4   | 4         | 3         | 4         | 4         |
| 379       | 5   | 5         | 6         | 4         | 5         |
| 380       | 1   | 3         | 2         | 3         | 2         |
| 381       | 0   | 1         | 2         | 2         | 2         |

*Supplementary Table S2: Data used to generate the heatmap for the crystallized interaction between PCSK9 and LDLR.*
